# Supplementary material for: Hospital Incidence, Sex Disparities, and Perioperative Mortality in Open Surgically Treated Patients with Aneurysms of the Ascending Aorta and Aortic Arch in Switzerland
Source: MDPI journal article supplement (doi:10.3390/healthcare12030388), 2024-02-02
Supplement: s1 [file s1]

**Table S2.** Treatment and Outcome of palliatively treated Ruptured Ascending and Arch Aortic Aneurysms

|                                    | male (N=79) | female (N=75) | Total (N=154) | p value |
|------------------------------------|-------------|---------------|---------------|---------|
| <b>Destination after discharge</b> |             |               |               | 0.526   |
| Home                               | 3 (3.8%)    | 4 (5.3%)      | 7 (4.5%)      |         |
| Other                              | 0 (0.0%)    | 1 (1.3%)      | 1 (0.6%)      |         |
| Deseased                           | 76 (96.2%)  | 70 (93.3%)    | 146 (94.8%)   |         |
| <b>Hospital Mortality</b>          | 76 (96.2%)  | 70 (93.3%)    | 146 (94.8%)   | 0.423   |
