# Supplementary material for: Hospital Incidence, Sex Disparities, and Perioperative Mortality in Open Surgically Treated Patients with Aneurysms of the Ascending Aorta and Aortic Arch in Switzerland
Source: MDPI journal article supplement (doi:10.3390/healthcare12030388), 2024-02-02
Supplement: s1 [file s1]

**Table S1.** Utilised codes of procedures (CHOPS) and diagnoses (ICD-10)

| <b>Definitions</b>                      |                                                                                                                                                                                                                                                                                                                                                                         |
|-----------------------------------------|-------------------------------------------------------------------------------------------------------------------------------------------------------------------------------------------------------------------------------------------------------------------------------------------------------------------------------------------------------------------------|
| <b>Thoracic Aneurysm</b>                | <p>ICD-10: I71.1, I71.2</p> <p>AND</p> <p>CHOP-2018-Aorta: 38.45.00, 38.45.10, 38.45.11, 38.45.12, 38.45.14, 38.45.19, 38.45.20, 38.45.29, 38.64, 38.40, 38.52, 38.45</p> <p>AND</p> <p>CHOP-2018-ECC: 39.61.00, 39.61.1, 39.61.10, 39.61.11, 39.61.12, 39.61.13, 39.61.14, 39.61.15, 39.61.2, 39.61.21, 39.61.22, 39.61.23, 39.61.24, 39.61.25, 39.61.26, 39.61.99</p> |
| <b>ICD-10 main Diagnosis (Details):</b> |                                                                                                                                                                                                                                                                                                                                                                         |
| I71.1                                   | Aneurysma der Aorta thoracica, rupturiert                                                                                                                                                                                                                                                                                                                               |
| I71.2                                   | Aneurysma der Aorta thoracica, ohne Angabe einer Ruptur                                                                                                                                                                                                                                                                                                                 |
| <b>CHOP-2018-Aorta (Details):</b>       |                                                                                                                                                                                                                                                                                                                                                                         |
| 38.45.00                                | Resektion von thorakalen Blutgefäßen mit Ersatz,n.n.bez.                                                                                                                                                                                                                                                                                                                |
| 38.45.10                                | Resektion der thorakalen Aorta mit Ersatz,n.n.bez.                                                                                                                                                                                                                                                                                                                      |
| 38.45.11                                | Resektion der Aorta ascendens oder des Aortenbogens mit Ersatz                                                                                                                                                                                                                                                                                                          |
| 38.45.12                                | Resektion der Aorta thoracica mit Ersatz                                                                                                                                                                                                                                                                                                                                |
| 38.45.14                                | Available since 2011: Resektion der thorakalen Aorta und Ersatz mit Hybridprothese                                                                                                                                                                                                                                                                                      |
| 38.45.19                                | Resektion der thorakalen Aorta mit Ersatz, sonstige Resektion sonstiger thorakaler Arterien mit Ersatz, n.n.bez.                                                                                                                                                                                                                                                        |
| 38.45.20                                |                                                                                                                                                                                                                                                                                                                                                                         |
| 38.45.29                                | Resektion sonstiger thorakaler Arterien mit Ersatz                                                                                                                                                                                                                                                                                                                      |
| 38.64                                   | Only available in 2009/2010: "Sonstige Exzision der Aorta (bogen, ascendens, descendens, abdominalis)"                                                                                                                                                                                                                                                                  |
| 38.40'                                  | Only available in 2009/2010: "Resektion von Blutgefäßen mit Ersatz, Lokalisation n.n.bez."                                                                                                                                                                                                                                                                              |
| 39.52                                   | Only available in 2009/2010: "Aneurysmorrhaphie durch oder mit Anastomose Aorta thoracalis"                                                                                                                                                                                                                                                                             |
| 38.45                                   | Only available in 2009/2010: Resektion von thorakalen Blutgefäßen mit Ersatz                                                                                                                                                                                                                                                                                            |
| <b>CHOP-2018-ECC (Details):</b>         |                                                                                                                                                                                                                                                                                                                                                                         |
| 39.61.00                                | Extrakorporelle Zirkulation (ECC), n.n.bez.                                                                                                                                                                                                                                                                                                                             |
| 39.61.1                                 | Konventionelle extrakorporelle Zirkulation Herz-Lungen-Maschine                                                                                                                                                                                                                                                                                                         |
| 39.61.10                                | Konventionelle extrakorporelle Zirkulation (ECC) unter Normothermie (mehr als 35 °C)                                                                                                                                                                                                                                                                                    |

|          |                                                                                                      |
|----------|------------------------------------------------------------------------------------------------------|
| 39.61.11 | Konventionelle extrakorporelle Zirkulation (ECC)<br>unter milder Hypothermie (32 - 35 °C)            |
| 39.61.12 | Konventionelle extrakorporelle Zirkulation (ECC)<br>unter moderater Hypothermie (26 bis unter 32 °C) |
| 39.61.13 | Konventionelle extrakorporelle Zirkulation (ECC)<br>unter tiefer Hypothermie (20 bis unter 26 °C)    |
| 39.61.14 | Konventionelle extrakorporelle Zirkulation (ECC)<br>unter profunder Hypothermie (unter 20 °C)        |
| 39.61.15 | Konventionelle extrakorporale Zirkulation (ECC)<br>unter Hypothermie, unbekannte Temperatur          |
| 39.61.2  | Minimalisierte extrakorporelle Zirkulation                                                           |
| 39.61.21 | Minimalisierte extrakorporelle Zirkulation unter<br>Normothermie (mehr als 35 °C)                    |
| 39.61.22 | Minimalisierte extrakorporelle Zirkulation unter<br>milder Hypothermie (32 - 35 °C)                  |
| 39.61.23 | Minimalisierte extrakorporelle Zirkulation unter<br>moderater Hypothermie (26 bis unter 32 °C)       |
| 39.61.24 | Minimalisierte extrakorporelle Zirkulation unter tiefer<br>Hypothermie (20 bis unter 26 °C)          |
| 39.61.25 | Minimalisierte extrakorporelle Zirkulation unter<br>profunder Hypothermie (unter 20 °C)              |
| 39.61.26 | Minimalisierte extrakorporelle Zirkulation unter<br>Hypothermie, unbekannte Temperatur               |
| 39.61.99 | Extrakorporelle Zirkulation (ECC), sonstige                                                          |

#### **CHOP-2018-**

#### **Aortenklappenersa tz (Details):**

|          |                                                                                                                                                |
|----------|------------------------------------------------------------------------------------------------------------------------------------------------|
| 35.F1    | Aortenklappenersatz durch Herzklappenprothese<br>oder klappentragende Gefäßprothese oder<br>klappentragende Gefäßprothese                      |
| 35.F1.0  | Detail der Subkategorie 35.F1                                                                                                                  |
| 35.F1.00 | Aortenklappenersatz durch Herzklappenprothese<br>oder klappentragende Gefäßprothese, n.n.bez.                                                  |
| 35.F1.09 | Aortenklappenersatz durch Herzklappenprothese<br>oder klappentragende Gefäßprothese, sonstige                                                  |
| 35.F1.1  | Aortenklappenersatz durch Allograft (Homograft)                                                                                                |
| 35.F1.11 | Aortenklappenersatz durch Allograft (Homograft),<br>über vollständige Sternotomie                                                              |
| 35.F1.12 | Aortenklappenersatz durch Allograft (Homograft),<br>über minimal-invasive Thorakotomie (partielle obere<br>Sternotomie, laterale Thorakotomie) |
| 35.F1.2  | Aortenklappenersatz durch Xenograft                                                                                                            |
| 35.F1.21 | Aortenklappenersatz durch Xenograft, über<br>vollständige Sternotomie                                                                          |
| 35.F1.22 | Aortenklappenersatz durch Xenograft, über minimal-<br>invasive Thorakotomie (partielle obere Sternotomie,<br>laterale Thorakotomie)            |
| 35.F1.23 | Aortenklappenersatz durch Xenograft,<br>endovaskulärer Zugang                                                                                  |
| 35.F1.24 | Aortenklappenersatz durch Xenograft, transapikal                                                                                               |

|          |                                                                                                                                                              |
|----------|--------------------------------------------------------------------------------------------------------------------------------------------------------------|
| 35.F1.25 | Aortenklappenersatz durch Xenograft, transapikal perkutan                                                                                                    |
| 35.F1.3  | Aortenklappenersatz durch Xenograft, stentless                                                                                                               |
| 35.F1.31 | Aortenklappenersatz durch Xenograft, stentless über vollständige Sternotomie                                                                                 |
| 35.F1.32 | Aortenklappenersatz durch Xenograft, stentless über minimal-invasive Thorakotomie (partielle obere Sternotomie, laterale Thorakotomie)                       |
| 35.F1.33 | Aortenklappenersatz durch Xenograft, stentless endovaskulärer Zugang                                                                                         |
| 35.F1.34 | Aortenklappenersatz durch Xenograft, stentless transapikal                                                                                                   |
| 35.F1.35 | Aortenklappenersatz durch Xenograft, stentless transapikal perkutan                                                                                          |
| 35.F1.4  | Aortenklappenersatz durch Xenograft, nahtfrei                                                                                                                |
| 35.F1.41 | Aortenklappenersatz durch Xenograft, nahtfrei über vollständige Sternotomie                                                                                  |
| 35.F1.42 | Aortenklappenersatz durch Xenograft, nahtfrei über minimal-invasive Thorakotomie (partielle obere Sternotomie, laterale Thorakotomie)                        |
| 35.F1.43 | Aortenklappenersatz durch Xenograft, nahtfrei endovaskulärer Zugang                                                                                          |
| 35.F1.44 | Aortenklappenersatz durch Xenograft, nahtfrei transapikal                                                                                                    |
| 35.F1.45 | Aortenklappenersatz durch Xenograft, nahtfrei transapikal perkutan                                                                                           |
| 35.F1.5  | Aortenklappenersatz durch mechanische Prothese                                                                                                               |
| 35.F1.51 | Aortenklappenersatz durch mechanische Prothese, über vollständige Sternotomie                                                                                |
| 35.F1.52 | Aortenklappenersatz durch mechanische Prothese, über minimal-invasive Thorakotomie (partielle obere Sternotomie, laterale Thorakotomie)                      |
| 35.F1.6  | Aortenklappenersatz durch klappentragende Gefäßprothese, biologisch (incl. Composite Graft)                                                                  |
| 35.F1.61 | Aortenklappenersatz durch klappentragende Gefäßprothese, biologisch, über vollständige Sternotomie                                                           |
| 35.F1.62 | Aortenklappenersatz durch klappentragende Gefäßprothese, biologisch, über minimal-invasive Thorakotomie (partielle obere Sternotomie, laterale Thorakotomie) |
| 35.F1.7  | Aortenklappenersatz durch klappentragende Gefäßprothese, mechanisch (incl. Composite Graft)                                                                  |
| 35.F1.71 | Aortenklappenersatz durch klappentragende Gefäßprothese, mechanisch, über vollständige Sternotomie                                                           |
| 35.F1.72 | Aortenklappenersatz durch klappentragende Gefäßprothese, mechanisch, über minimal-invasive Thorakotomie (partielle obere Sternotomie, laterale Thorakotomie) |

**ICD-10****Comorbidities:**

|                                      |                                   |
|--------------------------------------|-----------------------------------|
| Literature                           | Elixhauser Comorbidity Score (ES) |
| I25*                                 | Chronic ischemic heart disease    |
| I50*                                 | Chronic heart failure             |
| G45*, G46*, H340*,<br>I6*            | Cerebrovascular disease           |
| Elixhauser Item No.<br>6             | Hypertension                      |
| Elixhauser Item No.<br>9             | Chronic pulmonary disease         |
| Elixhauser Item No.<br>10 and 11     | Diabetes mellitus                 |
| Elixhauser Item No.<br>13            | Chronic kidney disease            |
| Elixhauser Item No.<br>17, 18 and 19 | Cancer                            |
| Elixhauser Item No.<br>22            | Obesity                           |
| Q87.4                                | Marfan-Syndrome                   |

**ICD-10****Perioperative****Diagnosis /****Complications:**

|              |                                            |
|--------------|--------------------------------------------|
| I21.*, I22.* | Acute/Recurrent myocardial infarction      |
| I63.4        | Acute stroke                               |
| G95.1        | Acute paraplegia (incl. spinal infarction) |
| I74.*        | Acute limb ischemia                        |
| K55.0        | Acute mesenteric infarction                |
| N28.0        | Acute renal artery infarction              |

---
